# Supplementary material
Source: publisher site journal article supplement (https://www.dovepress.com/article/541348)
Supplement: Supplementary file 1 [file supplementary%20materials.pdf]

| supplementary table S1. Virulence-related genes of HhutsZ1 |          |           |           |          |                                                                                                                                                                                                       |                                              |
|------------------------------------------------------------|----------|-----------|-----------|----------|-------------------------------------------------------------------------------------------------------------------------------------------------------------------------------------------------------|----------------------------------------------|
| Gene_id                                                    | Identity | E_value   | VF_id     | Type     | Description                                                                                                                                                                                           | VF_category                                  |
| HhutsZ1GL000313                                            | 84.2     | 0.00E+00  | VFG037720 | Verified | (adeG) cation/multidrug efflux pump [AdeFGH efflux pump (VF0504) - Biofilm (VFC0271)] [Acinetobacter baumannii ACICU]                                                                                 | Biofilm                                      |
| HhutsZ1GL000314                                            | 61.9     | 2.90E-127 | VFG037705 | Verified | (adeF) membrane-fusion protein [AdeFGH efflux pump (VF0504) - Biofilm (VFC0271)] [Acinetobacter baumannii ACICU]                                                                                      | Biofilm                                      |
| HhutsZ1GL000497                                            | 48.7     | 3.10E-169 | VFG014117 | Verified | (wbpM) nucleotide sugar epimerase/dehydratase WbpM [LPS (VF0085) - Immune modulation (VFC0258)] [Pseudomonas aeruginosa PAO1]                                                                         | Immune modulation                            |
| HhutsZ1GL000514                                            | 54.7     | 2.10E-148 | VFG014893 | Verified | (algC) phosphomannomutase AlgC [Alginate (VF0091) - Biofilm (VFC0271)] [Pseudomonas aeruginosa PAO1]                                                                                                  | Biofilm                                      |
| HhutsZ1GL000517                                            | 42.7     | 2.30E-80  | VFG000141 | Verified | (waaA) lipopolysaccharide core biosynthesis protein WaaP [LPS (VF0085) - Immune modulation (VFC0258)] [Pseudomonas aeruginosa PAO1]                                                                   | Immune modulation                            |
| HhutsZ1GL000546                                            | 40.2     | 1.20E-41  | VFG038840 | Verified | (flmH) short chain dehydrogenase/reductase family oxidoreductase [Polar flagella (VF0473) - Motility (VFC0204)] [Aeromonas hydrophila ML09-119]                                                       | Motility                                     |
| HhutsZ1GL000550                                            | 50.5     | 3.20E-79  | VFG043209 | Verified | (cheD) methyl-accepting chemotaxis protein CheD [Flagella (VF0394) - Motility (VFC0204)] [Yersinia enterocolitica subsp. enterocolitica 8081]                                                         | Motility                                     |
| HhutsZ1GL000649                                            | 57.9     | 2.60E-41  | VFG000478 | Verified | (fur) ferric iron uptake transcriptional regulator [Fur (VF0113) - Regulation (VFC0301)] [Salmonella enterica subsp. enterica serovar Typhimurium str. LT2]                                           | Regulation                                   |
| HhutsZ1GL000666                                            | 43.8     | 6.60E-74  | VFG002526 | Verified | (cheB) chemotaxis-specific methylesterase [Flagella (VF0430) - Motility (VFC0204)] [Burkholderia pseudomallei K96243]                                                                                 | Motility                                     |
| HhutsZ1GL000673                                            | 43.3     | 2.20E-73  | VFG047564 | Verified | (purM) phosphoribosylaminoimidazole synthetase [Purine biosynthesis (VF0559) - Nutritional/Metabolic factor (VFC0272)] [Francisella tularensis subsp. tularensis SCHU S4]                             | Nutritional/Metabolic factor                 |
| HhutsZ1GL000836                                            | 56.6     | 8.80E-40  | VFG039549 | Verified | (CBU_1594) Coxiella Dot/Icm type IVB secretion system translocated effector [T4SS secreted effectors (VF0696) - Effector delivery system (VFC0086)] [Coxiella burnetii RSA 493]                       | Effector delivery system                     |
| HhutsZ1GL000840                                            | 48.8     | 4.00E-77  | VFG043209 | Verified | (cheD) methyl-accepting chemotaxis protein CheD [Flagella (VF0394) - Motility (VFC0204)] [Yersinia enterocolitica subsp. enterocolitica 8081]                                                         | Motility                                     |
| HhutsZ1GL000913                                            | 49.2     | 1.30E-62  | VFG045346 | Verified | (IlpA) immunogenic lipoprotein A [IlpA (VF0513) - Adherence (VFC0001)] [Vibrio vulnificus YJ016]                                                                                                      | Adherence                                    |
| HhutsZ1GL001040                                            | 41.1     | 1.20E-42  | VFG038840 | Verified | (flmH) short chain dehydrogenase/reductase family oxidoreductase [Polar flagella (VF0473) - Motility (VFC0204)] [Aeromonas hydrophila ML09-119]                                                       | Motility                                     |
| HhutsZ1GL001113                                            | 53.4     | 6.00E-89  | VFG000670 | Verified | (gtrB) bactoprenol glucosyl transferase [LPS (VF0124) - Immune modulation (VFC0258)] [Shigella flexneri 2a str. 301]                                                                                  | Immune modulation                            |
| HhutsZ1GL001126                                            | 64.7     | 2.90E-75  | VFG001867 | Verified | (sodB) superoxide dismutase [SodB (VF0169) - Stress survival (VFC0282)] [Legionella pneumophila subsp. pneumophila str. Philadelphia 1]                                                               | Stress survival                              |
| HhutsZ1GL001132                                            | 53.1     | 1.50E-64  | VFG038845 | Verified | (nucA) NeuA protein [Polar flagella (VF0473) - Motility (VFC0204)] [Aeromonas hydrophila ML09-119]                                                                                                    | Motility                                     |
| HhutsZ1GL001365                                            | 65.7     | 0.00E+00  | VFG049144 | Verified | (acrB) acriflavine resistance protein B [AcrAB (VF0568) - Antimicrobial activity/Competitive advantage (VFC0325)] [Klebsiella pneumoniae subsp. pneumoniae NTUH-K2044]                                | Antimicrobial activity/Competitive advantage |
| HhutsZ1GL001479                                            | 44       | 5.60E-58  | VFG000028 | Verified | (brkB) serum resistance protein [Brk (VF0034) - Immune modulation (VFC0258)] [Bordetella pertussis Tohama I]                                                                                          | Immune modulation                            |
| HhutsZ1GL001777                                            | 49.4     | 2.50E-46  | VFG045340 | Verified | (ricA) type IV secretion system effector RicA, Rab2 interacting conserved protein A [T4SS secreted effectors (VF0695) - Effector delivery system (VFC0086)] [Brucella melitensis bv. 1 str. 16M]      | Effector delivery system                     |
| HhutsZ1GL001848                                            | 45.5     | 5.90E-58  | VFG045346 | Verified | (IlpA) immunogenic lipoprotein A [IlpA (VF0513) - Adherence (VFC0001)] [Vibrio vulnificus YJ016]                                                                                                      | Adherence                                    |
| HhutsZ1GL001882                                            | 46.5     | 5.80E-31  | VFG045327 | Verified | (LPG_RS11000) Hsp20 family protein [GspA (VF0167) - Stress survival (VFC0282)] [Legionella pneumophila subsp. pneumophila str. Philadelphia 1]                                                        | Stress survival                              |
| HhutsZ1GL001938                                            | 40.6     | 3.30E-23  | VFG041304 | Verified | (IirB) Dot/Icm type IV secretion system effector IirB [Dot/Icm T4SS secreted effectors (VF0798) - Effector delivery system (VFC0086)] [Legionella pneumophila subsp. pneumophila str. Philadelphia 1] | Effector delivery system                     |
| HhutsZ1GL002006                                            | 62.8     | 1.50E-79  | VFG038840 | Verified | (flmH) short chain dehydrogenase/reductase family oxidoreductase [Polar flagella (VF0473) - Motility (VFC0204)] [Aeromonas hydrophila ML09-119]                                                       | Motility                                     |
| HhutsZ1GL002007                                            | 61.1     | 8.60E-18  | VFG011430 | Verified | (acpXL) acyl carrier protein [LPS (VF0367) - Immune modulation (VFC0258)] [Brucella melitensis bv. 1 str. 16M]                                                                                        | Immune modulation                            |
| HhutsZ1GL002013                                            | 48.3     | 2.90E-116 | VFG014950 | Verified | (mucD) serine protease MucD precursor [Alginate (VF0091) - Biofilm (VFC0271)] [Pseudomonas aeruginosa PAO1]                                                                                           | Biofilm                                      |
| HhutsZ1GL002052                                            | 41.6     | 2.60E-81  | VFG037705 | Verified | (adeF) membrane-fusion protein [AdeFGH efflux pump (VF0504) - Biofilm (VFC0271)] [Acinetobacter baumannii ACICU]                                                                                      | Biofilm                                      |
| HhutsZ1GL002054                                            | 40.2     | 7.60E-85  | VFG037010 | Verified | (mtrE) multidrug efflux pump channel protein MtrE [MtrCDE (VF0451) - Antimicrobial activity/Competitive advantage (VFC0325)] [Neisseria meningitidis MC58]                                            | Antimicrobial activity/Competitive advantage |
| HhutsZ1GL002099                                            | 40.9     | 3.20E-25  | VFG013650 | Verified | (pilL) type IV pilus biosynthesis protein PilL [Type IV pili (VF0401) - Adherence (VFC0001)] [Yersinia pseudotuberculosis IP 31758]                                                                   | Adherence                                    |
| HhutsZ1GL002198                                            | 68.7     | 3.40E-109 | VFG013465 | Verified | (kdsA) 2-dehydro-3-deoxyphosphoacetate aldolase [LOS (VF0044) - Immune modulation (VFC0258)] [Haemophilus influenzae Rd KW20]                                                                         | Immune modulation                            |
| HhutsZ1GL002200                                            | 60.5     | 7.50E-76  | VFG050160 | Verified | (kpsU) 3-deoxy-manno-octulosonate cytidyltransferase [K1 capsule (VF0239) - Invasion (VFC0083)] [Escherichia coli O45:K1:H7 str. S88]                                                                 | Invasion                                     |
| HhutsZ1GL002223                                            | 79.5     | 6.80E-52  | VFG043206 | Verified | (cheY) chemotaxis regulatory protein CheY [Flagella (VF0394) - Motility (VFC0204)] [Yersinia enterocolitica subsp. enterocolitica 8081]                                                               | Motility                                     |
| HhutsZ1GL002226                                            | 69.8     | 1.10E-268 | VFG002522 | Verified | (flhA) flagellar biosynthesis protein FlhA [Flagella (VF0430) - Motility (VFC0204)] [Burkholderia pseudomallei K96243]                                                                                | Motility                                     |
| HhutsZ1GL002234                                            | 65.9     | 2.60E-46  | VFG002509 | Verified | (flgC) flagellar basal body rod protein FlgC [Flagella (VF0430) - Motility (VFC0204)] [Burkholderia pseudomallei K96243]                                                                              | Motility                                     |
| HhutsZ1GL002238                                            | 74.2     | 3.70E-110 | VFG002346 | Verified | (flgG) flagellar basal-body rod protein FlgG [Flagella (VF0394) - Motility (VFC0204)] [Yersinia enterocolitica subsp. enterocolitica 8081]                                                            | Motility                                     |
| HhutsZ1GL002255                                            | 41.8     | 6.10E-25  | VFG002498 | Verified | (fliJ) flagellar protein FliJ [Flagella (VF0430) - Motility (VFC0204)] [Burkholderia pseudomallei K96243]                                                                                             | Motility                                     |
| HhutsZ1GL002256                                            | 68.9     | 1.10E-173 | VFG002499 | Verified | (fliI) flagellum-specific ATP synthase FliI [Flagella (VF0430) - Motility (VFC0204)] [Burkholderia pseudomallei K96243]                                                                               | Motility                                     |
| HhutsZ1GL002262                                            | 45.9     | 3.50E-11  | VFG043362 | Verified | (LPG_RS13035) flagellar protein [Flagella (VF0157) - Motility (VFC0204)] [Legionella pneumophila subsp. pneumophila str. Philadelphia 1]                                                              | Motility                                     |
| HhutsZ1GL002335                                            | 51       | 3.40E-47  | VFG013265 | Verified | (orfM) deoxyribonucleotide triphosphate pyrophosphatase [LOS (VF0044) - Immune modulation (VFC0258)] [Haemophilus influenzae Rd KW20]                                                                 | Immune modulation                            |
| HhutsZ1GL002339                                            | 58.7     | 1.60E-55  | VFG000463 | Verified | (sodCI) Gifsy-2 prophage: superoxide dismutase precursor (Cu-Zn) [SodCI (VF0109) - Stress survival (VFC0282)] [Salmonella enterica subsp. enterica serovar Typhimurium str. LT2]                      | Stress survival                              |
| HhutsZ1GL003136                                            | 43.9     | 1.70E-94  | VFG001270 | Verified | (cyaD) cyclolysin secretion protein [Cya (VF0028) - Exotoxin (VFC0235)] [Bordetella pertussis Tohama I]                                                                                               | Exotoxin                                     |
| HhutsZ1GL003137                                            | 65       | 7.90E-267 | VFG001269 | Verified | (cyaB) cyclolysin secretion ATP-binding protein [Cya (VF0028) - Exotoxin (VFC0235)] [Bordetella pertussis Tohama I]                                                                                   | Exotoxin                                     |
| HhutsZ1GL003232                                            | 49.4     | 2.00E-79  | VFG000477 | Verified | (rpoS) RNA polymerase sigma factor RpoS [RpoS (VF0112) - Regulation (VFC0301)] [Salmonella enterica subsp. enterica serovar Typhimurium str. LT2]                                                     | Regulation                                   |
| HhutsZ1GL003272                                            | 42.1     | 1.80E-50  | VFG038840 | Verified | (flmH) short chain dehydrogenase/reductase family oxidoreductase [Polar flagella (VF0473) - Motility (VFC0204)] [Aeromonas hydrophila ML09-119]                                                       | Motility                                     |
| HhutsZ1GL003532                                            | 43.5     | 2.00E-94  | VFG043209 | Verified | (cheD) methyl-accepting chemotaxis protein CheD [Flagella (VF0394) - Motility (VFC0204)] [Yersinia enterocolitica subsp. enterocolitica 8081]                                                         | Motility                                     |
| HhutsZ1GL003852                                            | 59.1     | 5.00E-77  | VFG039536 | Verified | (CBU_1566) Coxiella Dot/Icm type IVB secretion system translocated effector [T4SS secreted effectors (VF0696) - Effector delivery system (VFC0086)] [Coxiella burnetii RSA 493]                       | Effector delivery system                     |
| HhutsZ1GL004004                                            | 42.3     | 5.20E-69  | VFG002529 | Verified | (tsr) methyl-accepting chemotaxis protein I [Flagella (VF0430) - Motility (VFC0204)] [Burkholderia pseudomallei K96243]                                                                               | Motility                                     |
| HhutsZ1GL004018                                            | 40.3     | 6.40E-40  | VFG045467 | Verified | (cdpA) cyclic di-GMP phosphodiesterase [CdpA (VF0432) - Regulation (VFC0301)] [Burkholderia pseudomallei K96243]                                                                                      | Regulation                                   |
| HhutsZ1GL004019                                            | 53.7     | 7.90E-78  | VFG043209 | Verified | (cheD) methyl-accepting chemotaxis protein CheD [Flagella (VF0394) - Motility (VFC0204)] [Yersinia enterocolitica subsp. enterocolitica 8081]                                                         | Motility                                     |
| HhutsZ1GL004130                                            | 42.7     | 1.10E-52  | VFG044084 | Verified | (PA2383) transcriptional regulator [Pyoverdine (VF0094) - Nutritional/Metabolic factor (VFC0272)] [Pseudomonas aeruginosa PAO1]                                                                       | Nutritional/Metabolic factor                 |
| HhutsZ1GL004172                                            | 47.9     | 4.80E-82  | VFG041011 | Verified | (vgrG1b) type VI secretion system substrate VgrG1b [HS1 (VF0334) - Effector delivery system (VFC0086)] [Pseudomonas aeruginosa PAO1]                                                                  | Effector delivery system                     |
| HhutsZ1GL004250                                            | 51.4     | 1.50E-298 | VFG049144 | Verified | (acrB) acriflavine resistance protein B [AcrAB (VF0568) - Antimicrobial activity/Competitive advantage (VFC0325)] [Klebsiella pneumoniae subsp. pneumoniae NTUH-K2044]                                | Antimicrobial activity/Competitive advantage |
| HhutsZ1GL004270                                            | 45.5     | 1.70E-70  | VFG050157 | Verified | (kpsF) Polysialic acid capsule expression protein [K1 capsule (VF0239) - Invasion (VFC0083)] [Escherichia coli O45:K1:H7 str. S88]                                                                    | Invasion                                     |
| HhutsZ1GL004275                                            | 46.3     | 4.30E-112 | VFG042736 | Verified | (rpoN) RNA polymerase factor sigma-54 [Type IV pili (VF0082) - Adherence (VFC0001)] [Pseudomonas aeruginosa PAO1]                                                                                     | Adherence                                    |
| HhutsZ1GL004386                                            | 49.6     | 3.40E-68  | VFG045297 | Verified | (wbuZ) glycosyl amidation-associated protein WbuZ [LPS (VF0171) - Immune modulation (VFC0258)] [Legionella pneumophila subsp. pneumophila str. Philadelphia 1]                                        | Immune modulation                            |
| HhutsZ1GL004388                                            | 47.8     | 2.90E-44  | VFG014106 | Verified | (hisH2) imidazole glycerol phosphate synthase subunit HisH [LPS (VF0085) - Immune modulation (VFC0258)] [Pseudomonas aeruginosa PAO1]                                                                 | Immune modulation                            |
| HhutsZ1GL004430                                            | 46.4     | 1.90E-32  | VFG000320 | Verified | (kdtB) lipopolysaccharide core biosynthesis protein [LPS (VF0056) - Immune modulation (VFC0258)] [Helicobacter pylori 26695]                                                                          | Immune modulation                            |
| HhutsZ1GL004458                                            | 43       | 1.90E-63  | VFG050217 | Verified | (CD0873) ABC transporter substrate-binding protein [CD0873 (VF0593) - Adherence (VFC0001)] [Clostridium difficile 630]                                                                                | Adherence                                    |
| HhutsZ1GL004493                                            | 54.8     | 5.60E-53  | VFG002527 | Verified | (cheD) chemoreceptor glutamine deamidase CheD [Flagella (VF0430) - Motility (VFC0204)] [Burkholderia pseudomallei K96243]                                                                             | Motility                                     |
| HhutsZ1GL004610                                            | 43       | 3.90E-14  | VFG050255 | Verified | (CT_473) hypothetical protein [TTSS secreted effectors (VF0711) - Effector delivery system (VFC0086)] [Chlamydia trachomatis D/UW-3/CX]                                                               | Effector delivery system                     |
| HhutsZ1GL004695                                            | 42       | 3.90E-73  | VFG047095 | Verified | (wbtI) DegT/DnrJ/EryC1/StrS family aminotransferase [LPS (VF0542) - Immune modulation (VFC0258)] [Francisella tularensis subsp. tularensis SCHU S4]                                                   | Immune modulation                            |
| HhutsZ1GL004915                                            | 59.1     | 0.00E+00  | VFG049144 | Verified | (acrB) acriflavine resistance protein B [AcrAB (VF0568) - Antimicrobial activity/Competitive advantage (VFC0325)] [Klebsiella pneumoniae subsp. pneumoniae NTUH-K2044]                                | Antimicrobial activity/Competitive advantage |
| HhutsZ1GL004916                                            | 50.8     | 3.20E-98  | VFG049133 | Verified | (acrA) acriflavine resistance protein A [AcrAB (VF0568) - Antimicrobial activity/Competitive advantage (VFC0325)] [Klebsiella pneumoniae subsp. pneumoniae NTUH-K2044]                                | Antimicrobial activity/Competitive advantage |
| HhutsZ1GL004920                                            | 46.5     | 2.50E-110 | VFG002529 | Verified | (tsr) methyl-accepting chemotaxis protein I [Flagella (VF0430) - Motility (VFC0204)] [Burkholderia pseudomallei K96243]                                                                               | Motility                                     |
| HhutsZ1GL005054                                            | 63       | 1.20E-27  | VFG000269 | Verified | (ureA) urease alpha subunit UreA [Urease (VF0050) - Stress survival (VFC0282)] [Helicobacter pylori 26695]                                                                                            | Stress survival                              |
| HhutsZ1GL005059                                            | 65.2     | 3.10E-75  | VFG000274 | Verified | (ureG) urease accessory protein (ureG) [Urease (VF0050) - Stress survival (VFC0282)] [Helicobacter pylori 26695]                                                                                      | Stress survival                              |
| HhutsZ1GL005099                                            | 42.5     | 6.80E-54  | VFG045346 | Verified | (IlpA) immunogenic lipoprotein A [IlpA (VF0513) - Adherence (VFC0001)] [Vibrio vulnificus YJ016]                                                                                                      | Adherence                                    |

supplementary table S2. Drug resistance-related genes of HhutSZ1

| Gene_id         | Identity | E_value   | Subject_id | Resistance_Type | Min_Identity | Resistance_Requirement                                                                    | Antibiotic_Resistance                                                               | Original_Resistance_Type | Description                                                                                                                                                                                                                                                                                                                                                                                                    |
|-----------------|----------|-----------|------------|-----------------|--------------|-------------------------------------------------------------------------------------------|-------------------------------------------------------------------------------------|--------------------------|----------------------------------------------------------------------------------------------------------------------------------------------------------------------------------------------------------------------------------------------------------------------------------------------------------------------------------------------------------------------------------------------------------------|
| HhutSZ1GL000312 | 61.7     | 9.30E-169 | ar db_1260 | opcm            | 80           | ceoa,ceob                                                                                 | chloramphenicol                                                                     | ceo                      | Resistance-nodulation-cell division transporter system. Multidrug resistance efflux pump.                                                                                                                                                                                                                                                                                                                      |
| HhutSZ1GL000313 | 80.6     | 0.00E+00  | ar db_1637 | ceob            | 80           | ceoa,opcm                                                                                 | chloramphenicol                                                                     | ceo                      | Resistance-nodulation-cell division transporter system. Multidrug resistance efflux pump.                                                                                                                                                                                                                                                                                                                      |
| HhutSZ1GL000314 | 62.9     | 1.80E-135 | ar db_76   | ceoa            | 80           | ceob,opcm                                                                                 | chloramphenicol                                                                     | ceo                      | Resistance-nodulation-cell division transporter system. Multidrug resistance efflux pump.                                                                                                                                                                                                                                                                                                                      |
| HhutSZ1GL000332 | 45.4     | 5.20E-139 | ar db_2181 | pbp2b           | 80           | --                                                                                        | penicillin                                                                          | pbp                      | The enzyme has a penicillin-insensitive transglycosylase N-terminal domain (formation of linear glycan strands) and a penicillin-sensitive transpeptidase C-terminal domain (cross-linking of the peptide subunits)                                                                                                                                                                                            |
| HhutSZ1GL000518 | 52.8     | 9.00E-129 | ar db_1138 | oprm            | 80           | mexa,mexb,mexj,mexk,mexl,mexm,mexn,mexo,mexp,mexq,mexr,mexs,mext,mexu,mexv,mexw,mexx,mexy | aminoglycoside,tigecycline,fluoroquinolone,beta_lactam,tetracycline                 | mexab                    | Resistance-nodulation-cell division transporter system. Multidrug resistance efflux pump.                                                                                                                                                                                                                                                                                                                      |
| HhutSZ1GL000519 | 59.6     | 0.00E+00  | ar db_108  | acrb            | 80           | acra,tolc                                                                                 | aminoglycoside,glycyl cycline,macrolide,beta_lactam,acriflavin                      | acr                      | Resistance-nodulation-cell division transporter system. Multidrug resistance efflux pump.                                                                                                                                                                                                                                                                                                                      |
| HhutSZ1GL000520 | 52.8     | 4.00E-103 | ar db_1683 | acra            | 80           | acrb,tolc                                                                                 | aminoglycoside,glycyl cycline,macrolide,beta_lactam,acriflavin                      | acr                      | Resistance-nodulation-cell division transporter system. Multidrug resistance efflux pump.                                                                                                                                                                                                                                                                                                                      |
| HhutSZ1GL000528 | 72.5     | 2.20E-111 | ar db_219  | baca            | 30           | --                                                                                        | bacitracin                                                                          | baca                     | Undecaprenyl pyrophosphate phosphatase, which consists in the sequestration of Undecaprenyl pyrophosphate.                                                                                                                                                                                                                                                                                                     |
| HhutSZ1GL000759 | 51.2     | 1.10E-67  | ar db_2770 | ksga            | 80           | --                                                                                        | kasugamycin                                                                         | ksga                     | Specifically dimethylates two adjacent adenosines in the loop of a conserved hairpin near the 3'-end of 16S rRNA in the 30S particle. Its inactivation leads to kasugamycin resistance.                                                                                                                                                                                                                        |
| HhutSZ1GL000890 | 61.5     | 2.60E-137 | ar db_543  | rosa            | 80           | rosb                                                                                      | fosmidomycin                                                                        | rosab                    | Efflux pump/potassium antiporter system. RosA: Major facilitator superfamily transporter. RosB: Potassium antiporter.                                                                                                                                                                                                                                                                                          |
| HhutSZ1GL001101 | 48.2     | 2.30E-116 | ar db_1137 | oprm            | 80           | mexa,mexb,mexj,mexk,mexl,mexm,mexn,mexo,mexp,mexq,mexr,mexs,mext,mexu,mexv,mexw,mexx,mexy | aminoglycoside,tigecycline,fluoroquinolone,beta_lactam,tetracycline                 | mexab                    | Resistance-nodulation-cell division transporter system. Multidrug resistance efflux pump.                                                                                                                                                                                                                                                                                                                      |
| HhutSZ1GL001364 | 54.7     | 3.20E-108 | ar db_1691 | acra            | 80           | acrb,tolc                                                                                 | aminoglycoside,glycyl cycline,macrolide,beta_lactam,acriflavin                      | acr                      | Resistance-nodulation-cell division transporter system. Multidrug resistance efflux pump.                                                                                                                                                                                                                                                                                                                      |
| HhutSZ1GL001365 | 65.7     | 0.00E+00  | ar db_1925 | acrb            | 80           | acra,tolc                                                                                 | aminoglycoside,glycyl cycline,macrolide,beta_lactam,acriflavin                      | acr                      | Resistance-nodulation-cell division transporter system. Multidrug resistance efflux pump.                                                                                                                                                                                                                                                                                                                      |
| HhutSZ1GL001366 | 55.8     | 5.10E-143 | ar db_1138 | oprm            | 80           | mexa,mexb,mexj,mexk,mexl,mexm,mexn,mexo,mexp,mexq,mexr,mexs,mext,mexu,mexv,mexw,mexx,mexy | aminoglycoside,tigecycline,fluoroquinolone,beta_lactam,tetracycline                 | mexab                    | Resistance-nodulation-cell division transporter system. Multidrug resistance efflux pump.                                                                                                                                                                                                                                                                                                                      |
| HhutSZ1GL001416 | 42.1     | 2.20E-127 | ar db_2143 | pbp1a           | 80           | --                                                                                        | penicillin                                                                          | pbp                      | The enzyme has a penicillin-insensitive transglycosylase N-terminal domain (formation of linear glycan strands) and a penicillin-sensitive transpeptidase C-terminal domain (cross-linking of the peptide subunits)                                                                                                                                                                                            |
| HhutSZ1GL001577 | 42.1     | 5.80E-102 | ar db_268  | opcm            | 80           | ceoa,ceob                                                                                 | chloramphenicol                                                                     | ceo                      | Resistance-nodulation-cell division transporter system. Multidrug resistance efflux pump.                                                                                                                                                                                                                                                                                                                      |
| HhutSZ1GL001884 | 49.8     | 4.90E-111 | ar db_1138 | oprm            | 80           | mexa,mexb,mexj,mexk,mexl,mexm,mexn,mexo,mexp,mexq,mexr,mexs,mext,mexu,mexv,mexw,mexx,mexy | aminoglycoside,tigecycline,fluoroquinolone,beta_lactam,tetracycline                 | mexab                    | Resistance-nodulation-cell division transporter system. Multidrug resistance efflux pump.                                                                                                                                                                                                                                                                                                                      |
| HhutSZ1GL002052 | 40.5     | 7.00E-82  | ar db_2230 | ceoa            | 80           | ceob,opcm                                                                                 | chloramphenicol                                                                     | ceo                      | Resistance-nodulation-cell division transporter system. Multidrug resistance efflux pump.                                                                                                                                                                                                                                                                                                                      |
| HhutSZ1GL002053 | 65.1     | 0.00E+00  | ar db_1600 | mexf            | 80           | mexe,opr n                                                                                | chloramphenicol,fluoroquinolone                                                     | mexcf                    | Resistance-nodulation-cell division transporter system. Multidrug resistance efflux pump.                                                                                                                                                                                                                                                                                                                      |
| HhutSZ1GL002054 | 53.9     | 5.70E-136 | ar db_1139 | oprm            | 80           | mexa,mexb,mexj,mexk,mexl,mexm,mexn,mexo,mexp,mexq,mexr,mexs,mext,mexu,mexv,mexw,mexx,mexy | aminoglycoside,tigecycline,fluoroquinolone,beta_lactam,tetracycline                 | mexab                    | Resistance-nodulation-cell division transporter system. Multidrug resistance efflux pump.                                                                                                                                                                                                                                                                                                                      |
| HhutSZ1GL002157 | 61.7     | 1.00E-189 | ar db_602  | rosb            | 80           | rosa                                                                                      | fosmidomycin                                                                        | rosab                    | Efflux pump/potassium antiporter system. RosA: Major facilitator superfamily transporter. RosB: Potassium antiporter.                                                                                                                                                                                                                                                                                          |
| HhutSZ1GL002245 | 57.4     | 4.50E-208 | ar db_2630 | macb            | 80           | maca,tolc                                                                                 | macrolide                                                                           | macab                    | Resistance-nodulation-cell division transporter system. Multidrug resistance efflux pump. Macrolide-specific efflux system.                                                                                                                                                                                                                                                                                    |
| HhutSZ1GL002281 | 54.3     | 9.10E-107 | ar db_736  | arna            | 80           | --                                                                                        | polymyxin                                                                           | arna                     | Bifunctional enzyme that catalyzes the oxidative decarboxylation of UDP-glucuronic acid (UDP-GlcUA) to UDP-4-keto-arabinose (UDP-Ara4O) and the addition of a formyl group to UDP-4-amino-4-deoxy-L-arabinose (UDP-L-Ara4N) to form UDP-L-4-formamido-arabinose (UDP-L-Ara4FN). The modified arabinose is attached to lipid A and is required for resistance to polymyxin and cationic antimicrobial peptides. |
| HhutSZ1GL002282 | 43.1     | 2.40E-63  | ar db_735  | arna            | 80           | --                                                                                        | polymyxin                                                                           | arna                     | Bifunctional enzyme that catalyzes the oxidative decarboxylation of UDP-glucuronic acid (UDP-GlcUA) to UDP-4-keto-arabinose (UDP-Ara4O) and the addition of a formyl group to UDP-4-amino-4-deoxy-L-arabinose (UDP-L-Ara4N) to form UDP-L-4-formamido-arabinose (UDP-L-Ara4FN). The modified arabinose is attached to lipid A and is required for resistance to polymyxin and cationic antimicrobial peptides. |
| HhutSZ1GL002779 | 40.7     | 1.00E-95  | ar db_271  | opcm            | 80           | ceoa,ceob                                                                                 | chloramphenicol                                                                     | ceo                      | Resistance-nodulation-cell division transporter system. Multidrug resistance efflux pump.                                                                                                                                                                                                                                                                                                                      |
| HhutSZ1GL003212 | 42.4     | 6.40E-85  | ar db_1951 | cml_c6          | 95           | --                                                                                        | chloramphenicol                                                                     | cml                      | Major facilitator superfamily transporter, chloramphenicol efflux pump.                                                                                                                                                                                                                                                                                                                                        |
| HhutSZ1GL003663 | 49       | 6.00E-67  | ar db_2955 | bl2be_ctxm      | 75           | --                                                                                        | monobactam,penicillin,cephalosporin_iii,cefazidime,cephalosporin_ii,cephalosporin_i | bla_a                    | Class A beta-lactamase. This enzyme breaks the beta-lactam antibiotic ring open and deactivates the molecule's antibacterial properties.                                                                                                                                                                                                                                                                       |
| HhutSZ1GL003781 | 41.1     | 2.20E-23  | ar db_568  | dfra20          | 95           | --                                                                                        | trimethoprim                                                                        | dfra                     | Group A drug-insensitive dihydrofolate reductase, which can not be inhibited by trimethoprim.                                                                                                                                                                                                                                                                                                                  |
| HhutSZ1GL004250 | 62.8     | 0.00E+00  | ar db_1517 | adeb            | 80           | adea,adec                                                                                 | chloramphenicol,aminoglycoside                                                      | adeabc                   | Resistance-nodulation-cell division transporter system. Multidrug resistance efflux pump.                                                                                                                                                                                                                                                                                                                      |
| HhutSZ1GL004469 | 41.1     | 1.80E-126 | ar db_2143 | pbp1a           | 80           | --                                                                                        | penicillin                                                                          | pbp                      | The enzyme has a penicillin-insensitive transglycosylase N-terminal domain (formation of linear glycan strands) and a penicillin-sensitive transpeptidase C-terminal domain (cross-linking of the peptide subunits)                                                                                                                                                                                            |
| HhutSZ1GL004914 | 54       | 3.10E-137 | ar db_1138 | oprm            | 80           | mexa,mexb,mexj,mexk,mexl,mexm,mexn,mexo,mexp,mexq,mexr,mexs,mext,mexu,mexv,mexw,mexx,mexy | aminoglycoside,tigecycline,fluoroquinolone,beta_lactam,tetracycline                 | mexab                    | Resistance-nodulation-cell division transporter system. Multidrug resistance efflux pump.                                                                                                                                                                                                                                                                                                                      |
| HhutSZ1GL004915 | 60.4     | 0.00E+00  | ar db_108  | acrb            | 80           | acra,tolc                                                                                 | aminoglycoside,glycyl cycline,macrolide,beta_lactam,acriflavin                      | acr                      | Resistance-nodulation-cell division transporter system. Multidrug resistance efflux pump.                                                                                                                                                                                                                                                                                                                      |
| HhutSZ1GL004916 | 52.8     | 7.60E-103 | ar db_2089 | mexa            | 80           | mexb,opr m                                                                                | aminoglycoside,tigecycline,fluoroquinolone,beta_lactam,tetracycline                 | mexab                    | Resistance-nodulation-cell division transporter system. Multidrug resistance efflux pump.                                                                                                                                                                                                                                                                                                                      |
| HhutSZ1GL004921 | 41.9     | 1.00E-87  | ar db_268  | opcm            | 80           | ceoa,ceob                                                                                 | chloramphenicol                                                                     | ceo                      | Resistance-nodulation-cell division transporter system. Multidrug resistance efflux pump.                                                                                                                                                                                                                                                                                                                      |
| HhutSZ1GL004942 | 55.5     | 9.10E-29  | ar db_1271 | emre            | 80           | emrd                                                                                      | aminoglycoside                                                                      | emre                     | Multidrug resistance efflux pump.                                                                                                                                                                                                                                                                                                                                                                              |
| HhutSZ1GL005173 | 40.8     | 1.80E-29  | ar db_2395 | vanrc           | 80           | vanc,vanxyc,vant,vansc                                                                    | vancomycin                                                                          | vanc                     | VanC type vancomycin resistance operon genes, which can synthesize peptidoglycan with modified C-terminal D-Ala-D-Ala to D-alanine--D-serine.                                                                                                                                                                                                                                                                  |
